# Supplementary material for: Piezoresistive Multi-Walled Carbon Nanotube/Epoxy Strain Sensor with Pattern Design
Source: Materials (Basel). 2019 Nov 29;12(23):3962. doi: 10.3390/ma12233962 (PMC6926730; doi:10.3390/ma12233962)
Supplement: Supplementary file 1 [file materials-12-03962-s001.pdf]

Type of the Paper (Article)

# Piezoresistive Multi-Walled Carbon Nanotube/Epoxy Strain Sensor with Pattern Design

Mun-Young Hwang<sup>1,2,†</sup>, Dae-Hyun Han<sup>1,2,†</sup> and Lae-Hyong Kang<sup>1,2,3,\*</sup>

<sup>1</sup> Department of Mechatronics Engineering, Jeonbuk National University, 567 Baekje-daero, Deokjin-gu, Jeonju-si 54896, Korea; munyoung.h@jbnu.ac.kr (M.-Y.H.); dh.han@jbnu.ac.kr (D.-H.H.)

<sup>2</sup> LANL-JBNU Engineering Institute-Korea, Jeonbuk National University 567 Baekje-daero, Deokjin-gu, Jeonju-si 54896, Korea

<sup>3</sup> Department of Flexible and Printable Electronics, Jeonbuk National University 567 Baekje-daero, Deokjin-gu, Jeonju-si 54896, Korea

\* Correspondence: reon.kang@jbnu.ac.kr; Tel.: +82-63-270-3372

<sup>†</sup> Mun-Young Hwang and Dae-Hyun Han contributed equally to this work.

Received: 31 October 2019; Accepted: 28 November 2019; Published: date

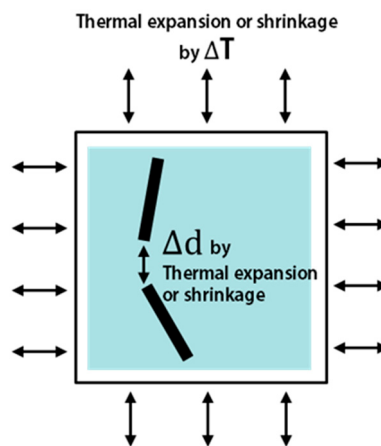

**Figure S1.** Variation in distance between particles due to thermal expansion or contraction of polymer according to temperature change.

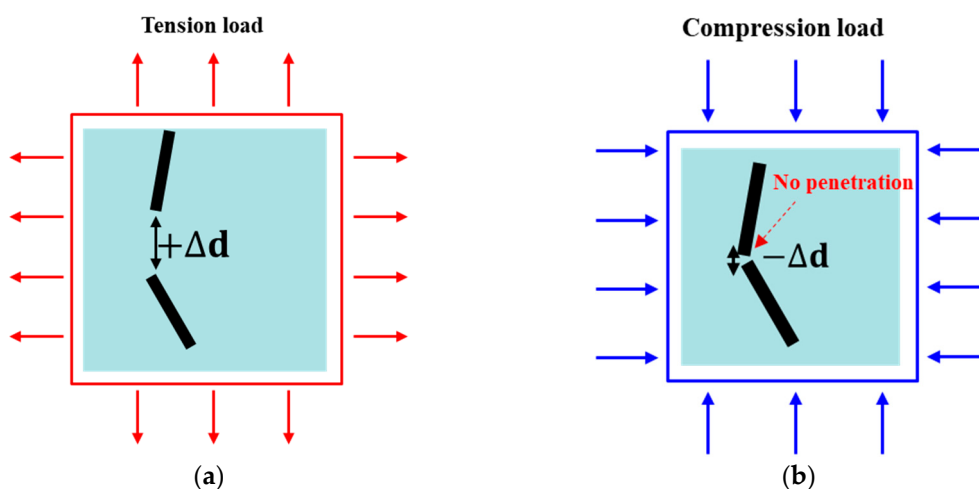

**Figure S2.** Operating mechanism of composite strain sensor by resistivity (a) under tension load and (b) compression.

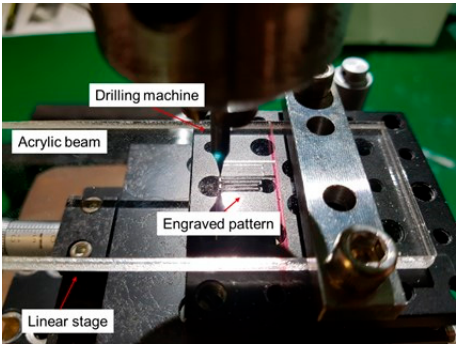

Figure S3. Engraved pattern made by drilling machine and linear stage for making constant pattern.

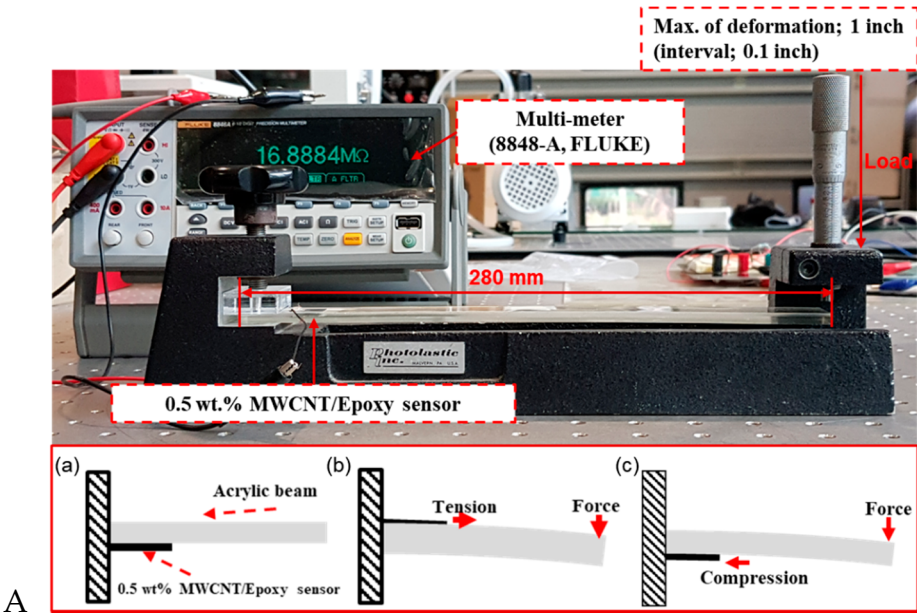

Figure S4. Resistance variation of MWCNT/epoxy composite strain sensor when deflection occurs at beam end: (a) stead state, (b) tension direction, and (c) compression direction.

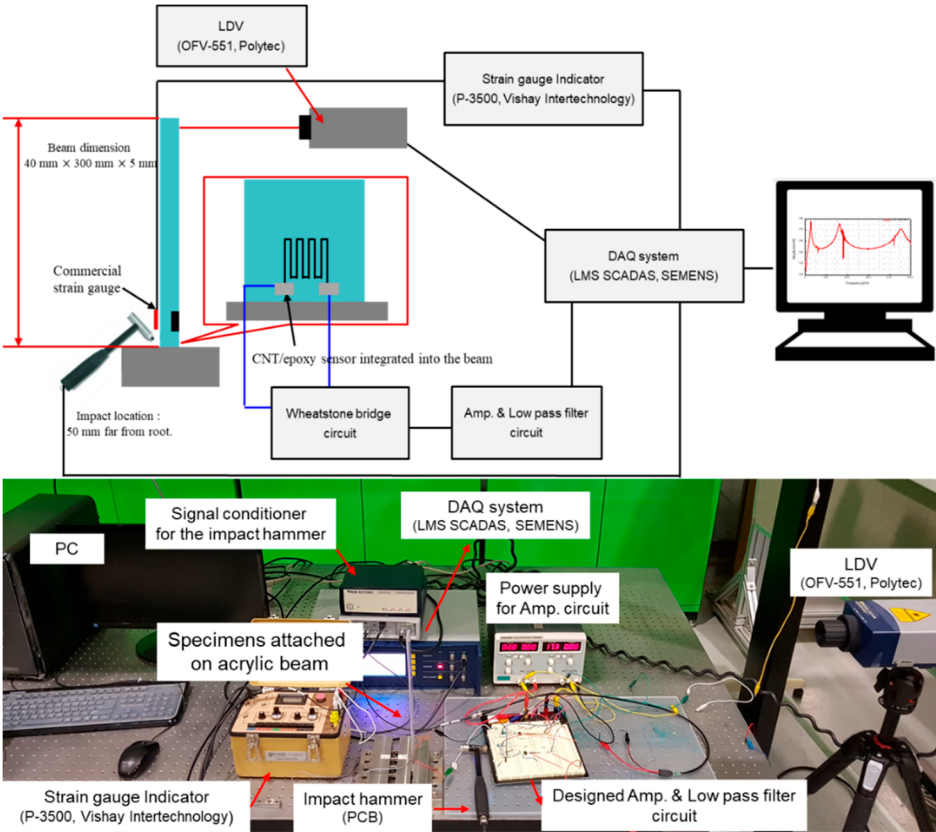

**Figure S5.** Experimental setup for testing measurement frequency response of sensor under free vibration of acrylic beam.

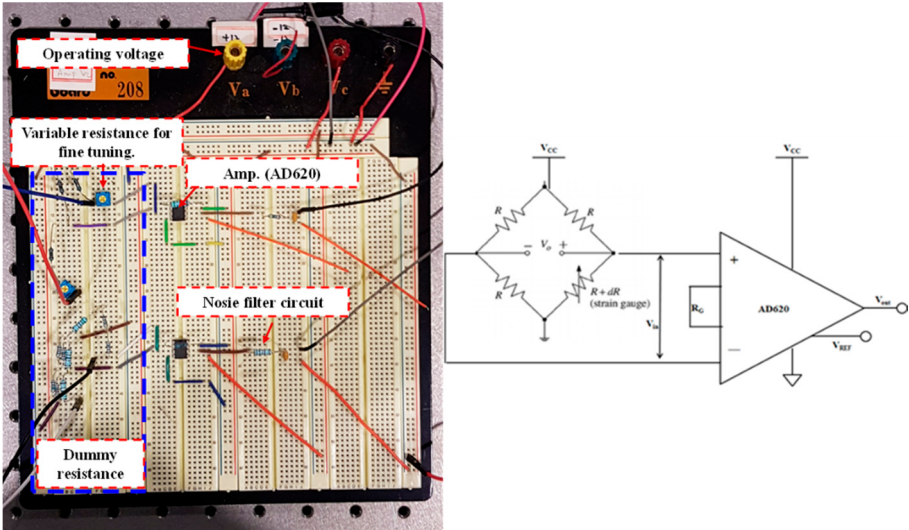

**Figure S6.** Amplifier circuit by non-inverter amplification for signal processing and Wheatstone bridge circuit for stabilizing output voltage generated by sensor.
